# Supplementary material
Source: Research Square preprint supplement (doi:10.21203/rs.3.rs-9610355/v1)
Supplement: Supplementary file 1 [file 4efb53802149ec536b3e07e4.docx]

| **Characteristic** | **Overall**  N = 14,205 |
| --- | --- |
| Age |  |
| 0-6 months | 726 (5.1%) |
| 7-36 months | 8,804 (62%) |
| > 36 months | 4,675 (33%) |
| Sex |  |
| Female | 5,011 (35%) |
| Male | 9,193 (65%) |
| Unknown | 1 |
| Weight (kg) |  |
| Mean (SD) | 15 (8) |
| Unknown | 986 |
| Croup severity |  |
| Mild | 4,701 (75%) |
| Moderate | 1,530 (24%) |
| Severe | 72 (1.1%) |
| Unknown | 7,902 |
| Dexamethasone dose |  |
| 0 mg/kg | 1,012 (7.5%) |
| 0.15 mg/kg | 142 (1.1%) |
| 0.3 mg/kg | 1,094 (8.1%) |
| 0.6 mg/kg | 11,249 (83%) |
| Multi dose | 9 (<0.1%) |
| Unknown | 699 |
| Site |  |
| Children’s Hospital A | 5,935 |
| Children’s Hospital B | 3,686 |
| Children’s Hospital C | 3,800 |
| Children’s Hospital D | 784 |

**Table 1:** Baseline demographics and clinical characteristics of children with croup.

Unknown represents the number of children with missing data not included in the analysis.

**Table 1 caption:** Baseline demographics and clinical characteristics of children with croup. The relevant demographic and clinical characteristics of the patients included in this cohort of children are presented in this table.

| **Characteristic** | Dose | | | Overall | | |
| --- | --- | --- | --- | --- | --- | --- |
| **All episodes** | **0.15 mg/kg**  N = 172 | **0.6 mg/kg**  N = 13,265 | | | **N = 13,437** | |
| Number of ED Return Visits (7 days) |  |  | | |  | |
| 0 | 167  (97%) | 12,669  (96%) | | | 12,836  (96%) | |
| 1 | 5 (2.9%) | 548 (4.1%) | | | 553 (4.1%) | |
| 2 | 0 (0%) | 38 (0.3%) | | | 38 (0.3%) | |
| 3 | 0 (0%) | 4 (<0.1%) | | | 4 (<0.1%) | |
| Unknown | 0 | 6 | | | 6 | |
| Number of Hospitalizations (7 days) |  |  | | |  | |
| 0 | 162 (94%) | 12,828 (97%) | | | 12,990 (97%) | |
| 1 | 10 (5.8%) | 413 (3.1%) | | | 423 (3.2%) | |
| 2 | 0 (0%) | 11 (<0.1%) | | | 11 (<0.1%) | |
| Unknown | 0 | 13 | | | 13 | |
| Site |  |  | | |  | |
| Children’s Hospital A |  |  |  | | | 5,365 | |
| Children’s Hospital B |  |  | | | 3,629 | |
| Children’s Hospital C |  |  | | | 3,800 | |
| Children’s Hospital D |  |  | | | 643 | |
| **First episodes** | **0.15mg/kg  N =** 142 | **0.6 mg/kg N =** 11,249 | | | **N = 11,391** | |
| Number of ED return visits (7 days) |  |  | | |  | |
| 0 | 137  (96%) | 10,739  (96%) | | | 10,876  (96%) | |
| 1 | 5  (3.5%) | 467  (4.2%) | | | 472  (4.1%) | |
| 2 | 0 (0%) | 35 (0.3%) | | | 35 (0.3%) | |
| 3 | 0 (0%) | 3 (<0.1%) | | | 3 (<0.1%) | |
| Unknown | 0 | 5 | | | 5 | |
| Number of Hospitalizations (7 days) |  |  | | |  | |
| 0 | 133  (94%) | 10,872 (97%) | | | 11,005 (97%) | |
| 1 | 9 (6.3%) | 357 (3.2%) | | | 366 (3.2%) | |
| 2 | 0 (0%) | 11 (<0.1%) | | | 11 (<0.1%) | |
| Unknown | 0 | 9 | | | 9 | |
| Site |  |  | | |  | |
| Children’s Hospital A |  |  | | | 4,470 | |
| Children’s Hospital B |  |  | | | 3,127 | |
| Children’s Hospital C |  |  | | | 3,262 | |
| Children’s Hospital D |  |  | | | 532 | |

**Table 2:** Return visits to the ED and hospitalizations within 7 days following treatment by the dose of dexamethasone received.

Unknown represents the number of croup episodes with missing data not included in the analysis. ED; Emergency department.

**Table 2 caption:** Return visits to the ED and hospitalizations within 7 days following treatment by the dose of dexamethasone received. The proportions and distributions of ED return visits and hospitalizations by dexamethasone dose are presented in this table. The proportions and distributions of all croup episodes and first episodes among the children in this cohort are also described.

| ED return visits (7 days), all episodes | Site + Dose + Sex + Age | | |
| --- | --- | --- | --- |
| **Characteristic** | **OR** | **95% CI** | **p-value** |
| Age |  |  |  |
| 0-6 months | — | — |  |
| 7-36 months | 1.20 | 0.84, 1.78 | 0.3 |
| > 36 months | 0.62 | 0.41, 0.95 | 0.024 |
| Sex |  |  |  |
| Female | — | — |  |
| Male | 1.11 | 0.94, 1.33 | 0.2 |
| Dose |  |  |  |
| 0.6 mg/kg | — | — |  |
| 0.15 mg/kg | 0.88 | 0.31, 1.97 | 0.8 |
| Site |  |  |  |
| Children’s Hospital A | — | — |  |
| Children’s Hospital B | 0.45 | 0.35, 0.57 | <0.001 |
| Children’s Hospital C | 0.79 | 0.65, 0.96 | 0.019 |
| Children’s Hospital D | 1.01 | 0.70, 1.43 | >0.9 |
| Hospitalization (7 days), all episodes |  | | |
| **Characteristic** |  | | |
| Age |  |  |  |
| 0-6 months | — | — |  |
| 7-36 months | 0.82 | 0.58, 1.20 | 0.3 |
| > 36 months | 0.29 | 0.19, 0.45 | <0.001 |
| Sex |  |  |  |
| Female | — | — |  |
| Male | 1.47 | 1.19, 1.83 | <0.001 |
| Dose |  |  |  |
| 0.6 mg/kg | — | — |  |
| 0.15 mg/kg | 3.18 | 1.52, 6.00 | <0.001 |
| Site |  |  |  |
| Children’s Hospital A | — | — |  |
| Children’s Hospital B | 1.06 | 0.85, 1.32 | 0.6 |
| Children’s Hospital C | 0.53 | 0.41, 0.69 | <0.001 |
| Children’s Hospital D | 0.35 | 0.17, 0.66 | 0.003 |
| Hospitalization within 7 days including time of enrollment. CI; Confidence Interval, OR; Odds Ratio, ED; Emergency department | | | |

**Table 3:** Adjusted odds ratio with 95% confidence interval of the association between dose of dexamethasone at 0.15mg/kg versus 0.6mg/kg and ED return visits and hospitalizations for all croup episodes

**Table 3 caption:** Adjusted odds ratio with 95% confidence interval of the association between the dose of dexamethasone at 0.15mg/kg versus 0.6mg/kg and ED return visits and hospitalizations for all croup episodes. The multi-variable logistic regression model adjusted for site, sex, and age.

**Table 4:** Adjusted odds ratio with 95% confidence interval of the association between dose of dexamethasone at 0.15mg/kg versus 0.6mg/kg and return visits to the ED and hospitalization for first croup episodes

| ED return visits (7 days), first episodes | | Site + Dose + Sex + Age | | | | |
| --- | --- | --- | --- | --- | --- | --- |
| **Characteristic** | | **OR** | | **95% CI** | | **p-value** |
| Age | |  | |  | |  |
| 0-6 months | | — | | — | |  |
| 7-36 months | | 1.24 | | 0.84, 1.92 | | 0.3 |
| > 36 months | | 0.63 | | 0.41, 1.02 | | 0.050 |
| Sex | |  | |  | |  |
| Female | | — | | — | |  |
| Male | | 1.12 | | 0.93, 1.36 | | 0.2 |
| Dose | |  | |  | |  |
| 0.6 mg/kg | | — | | — | |  |
| 0.15 mg/kg | | 1.05 | | 0.37, 2.36 | | >0.9 |
| Site | |  | |  | |  |
| Children’s Hospital A | | — | | — | |  |
| Children’s Hospital B | | 0.51 | | 0.40, 0.65 | | <0.001 |
| Children’s Hospital C | | 0.74 | | 0.60, 0.92 | | 0.006 |
| Children’s Hospital D | | 0.91 | | 0.60, 1.34 | | 0.7 |
| Hospitalization (7 days), first episodes |  | | | | | |
| **Characteristic** | |  |  | |
| Age | |  | |  | |  |
| 0-6 months | | — | | — | |  |
| 7-36 months | | 0.87 | | 0.59, 1.34 | | 0.5 |
| > 36 months | | 0.29 | | 0.18, 0.48 | | <0.001 |
| Sex | |  | |  | |  |
| Female | | — | | — | |  |
| Male | | 1.60 | | 1.27, 2.03 | | <0.001 |
| Dose | |  | |  | |  |
| 0.6 mg/kg | | — | | — | |  |
| 0.15 mg/kg | | 3.35 | | 1.53, 6.56 | | 0.001 |
| Site | |  | |  | |  |
| Children’s Hospital A | | — | | — | |  |
| Children’s Hospital B | | 0.98 | | 0.77, 1.24 | | 0.9 |
| Children’s Hospital C | | 0.51 | | 0.38, 0.67 | | <0.001 |
| Children’s Hospital D | | 0.34 | | 0.15, 0.66 | | 0.003 |
| CI; Confidence Interval, OR; Odds Ratio, ED; Emergency department. | | | | | | |

**Table 4 caption**: Adjusted odds ratio with 95% confidence interval of the association between the dose of dexamethasone at 0.15mg/kg versus 0.6mg/kg and ED return visits and hospitalizations for first croup episodes. The multi-variable logistic regression model adjusted for site, sex, and age.
