# Supplementary material
Source: Research Square preprint supplement (doi:10.21203/rs.3.rs-9610355/v1)
Supplement: Supplementary file 2 [file 93479dd3874ca8514c773d4b.docx]

| **Supplementary Table 1:** Adjusted odds ratio with 95% confidence interval of the association between dose of dexamethasone at 0.15mg/kg versus 0.6mg/kg and ED return visits for first croup episode. | | | |
| --- | --- | --- | --- |
| ED return visits (7 days), first episode | Age + Sex + Dose + Croup Severity | | |
| **Characteristic** | **OR** | **95% CI** | **p-value** |
| Age |  |  |  |
| 0-6 months | — | — |  |
| 7-36 months | 1.03 | 0.62, 1.84 | >0.9 |
| > 36 months | 0.39 | 0.21, 0.78 | 0.006 |
| Sex |  |  |  |
| Female | — | — |  |
| Male | 1.10 | 0.82, 1.48 | 0.5 |
| Dose |  |  |  |
| 0.6 mg/kg | — | — |  |
| 0.15 mg/kg | 0.00 | 0.00, 44.5 | >0.9 |
| Croup Severity |  |  |  |
| Mild | — | — |  |
| Moderate | 2.80 | 2.13, 3.68 | <0.001 |
| Severe | 2.31 | 0.69, 5.77 | 0.11 |
| CI; Confidence Interval, OR; Odds Ratio, ED; Emergency department | | | |

**Supplementary Table 1 caption**: Adjusted odds ratio with 95% confidence interval of the association between the dose of dexamethasone at 0.15mg/kg versus 0.6mg/kg and ED return visits for first croup episode. The multi-variable logistic regression model adjusted for age, sex, dose, and croup severity.

**Supplementary Table 2:** Proportions of children and the types of adverse events by the dose of dexamethasone received during all croup episodes

|  | Dose | | Overall |
| --- | --- | --- | --- |
| **Characteristic** | **0.15mg/kg** N = 172 | **0.6 mg/kg** N = 13,265 | **N = 13,437** |
| **Any adverse events 7 days** | 2 (1.2%) | 95 (0.7%) | 97 (0.7%) |
| Varicella | 0 (0%) | 0 (0%) | 0 (0%) |
| GI bleeding | 0 (0%) | 0 (0%) | 0 (0%) |
| Other bleeding | 0 (0%) | 0 (0%) | 0 (0%) |
| Pneumonia | 2 (1.2%) | 76 (0.6%) | 78 (0.6%) |
| Sepsis | 0 (0%) | 4 (<0.1%) | 4 (<0.1%) |
| Febrile convulsion | 0 (0%) | 2 (<0.1%) | 2 (<0.1%) |
| Bacteria Tracheitis | 0 (0%) | 10 (<0.1%) | 10 (<0.1%) |
| Influenza | 0 (0%) | 7 (<0.1%) | 7 (<0.1%) |
| Tachycardia | 0 (0%) | 0 (0%) | 0 (0%) |
| Restlessness | 0 (0%) | 0 (0%) | 0 (0%) |
| **Any adverse events 30 days** | 2 (1.2%) | 133 (1.0%) | 135 (1.0%) |
| Varicella | 0 (0%) | 0 (0%) | 0 (0%) |
| GI bleeding | 0 (0%) | 0 (0%) | 0 (0%) |
| Other bleeding | 0 (0%) | 0 (0%) | 0 (0%) |
| Pneumonia | 2 (1.2%) | 104 (0.8%) | 106 (0.8%) |
| Sepsis | 0 (0%) | 4 (<0.1%) | 4 (<0.1%) |
| Febrile convulsion | 0 (0%) | 6 (<0.1%) | 6 (<0.1%) |
| Bacteria Tracheitis | 0 (0%) | 12 (<0.1%) | 12 (<0.1%) |
| Influenza | 0 (0%) | 11 (<0.1%) | 11 (<0.1%) |
| Tachycardia | 0 (0%) | 0 (0%) | 0 (0%) |
| Restlessness | 0 (0%) | 0 (0%) | 0 (0%) |

**Supplementary Table 2 caption:** Proportions of children and the types of adverse events by the dose of dexamethasone received during all croup episodes. The distributions of adverse events within 7 and 30 days following treatment of croup with dexamethasone at 0.15mg/kg versus 0.6mg/kg are shown in this table.

**Supplementary Table 3**: Types and proportions of adverse events by the dose of dexamethasone received during first croup episodes

|  | Dose | | Overall |
| --- | --- | --- | --- |
| **Characteristic** | **0.15mg/kg** N = 142 | **0.6 mg/kg** N = 11,249 | **N = 11,391** |
| **Any adverse events 7 days** | 1 (0.7%) | 79 (0.7%) | 80 (0.7%) |
| Varicella | 0 (0%) | 0 (0%) | 0 (0%) |
| GI bleeding | 0 (0%) | 0 (0%) | 0 (0%) |
| Other bleeding | 0 (0%) | 0 (0%) | 0 (0%) |
| Pneumonia | 1 (0.7%) | 63 (0.6%) | 64 (0.6%) |
| Sepsis | 0 (0%) | 3 (<0.1%) | 3 (<0.1%) |
| Febrile convulsion | 0 (0%) | 2 (<0.1%) | 2 (<0.1%) |
| Bacteria Tracheitis | 0 (0%) | 8 (<0.1%) | 8 (<0.1%) |
| Influenza | 0 (0%) | 6 (<0.1%) | 6 (<0.1%) |
| Tachycardia | 0 (0%) | 0 (0%) | 0 (0%) |
| Restlessness | 0 (0%) | 0 (0%) | 0 (0%) |
| **Any adverse events 30 days** | 1 (0.7%) | 114 (1.0%) | 115 (1.0%) |
| Varicella | 0 (0%) | 0 (0%) | 0 (0%) |
| GI bleeding | 0 (0%) | 0 (0%) | 0 (0%) |
| Other bleeding | 0 (0%) | 0 (0%) | 0 (0%) |
| Pneumonia | 1 (0.7%) | 89 (0.8%) | 90 (0.8%) |
| Sepsis | 0 (0%) | 3 (<0.1%) | 3 (<0.1%) |
| Febrile convulsion | 0 (0%) | 5 (<0.1%) | 5 (<0.1%) |
| Bacteria Tracheitis | 0 (0%) | 10 (<0.1%) | 10 (<0.1%) |
| Influenza | 0 (0%) | 10 (<0.1%) | 10 (<0.1%) |
| Tachycardia | 0 (0%) | 0 (0%) | 0 (0%) |
| Restlessness | 0 (0%) | 0 (0%) | 0 (0%) |

**Supplementary Table 3:** Proportions of children and the types of adverse events by the site and dose of dexamethasone received during first croup episodes. The distributions of adverse events within 7 and 30 days following treatment of croup with dexamethasone at 0.15mg/kg versus 0.6mg/kg are shown in this table.
