# Supplementary material
Source: Research Square preprint supplement (doi:10.21203/rs.3.rs-9610355/v1)
Supplement: Supplementary file 3 [file ec00694af53c3b2ba1f0ed74.docx]

**LIST OF SUPPLEMENTAL DIGITAL CONTENT**

**Supplemental Digital Content 1: Appendix 1.** Chart review data extraction form.

**Supplemental Digital Content 2: Appendix 2.** ICD-10 for croup diagnosis and adverse events of interest.
